# Supplementary material for: TFA-catalyzed ring transformation of 4-hydroxycyclobutenone: A simple and general route for preparation of 3-substituted 4-aminofuran-2(5H )-ones †
Source: Royal Society of Chemistry journal article supplement (doi:10.1039/b004654j), 2001-01-01
Supplement: b004654j.doc [file b004654j.doc]

# Supplementary data

#### TFA catalyzed ring transformation of 4-hydroxycyclobutenone: a facile and general route for preparation of 3-substituted 4-aminofuran-2(5*H*)-ones

**Jie Wang,*a*Xin Jiang,*a* Ming Chen,*a* Zongming Ge,*a* Yuefei Hu,**ab* and Hongwen Hu*ab***

*a* Department of Chemistry and *b* Coordination Chemistry Institute, Nanjing University, Nanjing 210093, People’s Republic of China

Elemental analyses results and detailed IR, MS spectra of new compounds 14a–o, 15a–o, 4a–m, and 4o

**3-Amino-4-phenylcyclobutene-1,2-dione (14a)** (Found: C, 69.20; H, 4.18; N, 8.09. C10H7O2N requires C, 69.36; H, 4.07; N, 8.09%); max/cm-1 3316, 3119, 1791, 1721, 1661, 1600; *m/z* 173 (M+, 12.7%), 145 (19.6), 117 (100), 104 (15.3), 89 (34.2), 77 (3.6), 63 (13.3), 51 (6.1).

**3-Allylamino-4-phenylcyclobutene-1,2-dione (14b)** (Found: C, 73.20; H, 5.12; N, 6.59. C13H11O2N requires C, 73.23; H, 5.20; N, 6.57%);max/cm-1 3166, 3056, 1779, 1724, 1642, 1579; *m/z* 213 (M+, 27.1%), 184 (22.4), 156 (48.7), 129 (35.7), 116 (25.9), 89 (100), 63 (24.4), 41 (29.2).

**3-(3-Methylbenzylamino)-4-phenylcyclobutene-1,2-dione (14c)** (Found: C, 78.04; H, 5.45; N, 5.13. C18H15O2N requires C, 77.96; H, 5.45; N, 5.05%);max/cm-1 3197, 3053, 1772, 1718, 1580; *m/z* 277 (M+, 57.8%), 262 (43.1), 248 (52.0), 221 (21.5), 144 (15.8), 132 (15.5), 116 (14.6), 105 (100), 92 (58.4), 77 (17.8).

**3-(3-Trifluoromethylbenzylamino)-4-phenylcyclobutene-1,2-dione (14d)** (Found: C, 65.34; H, 3.82; N, 4.10. C18H12O2NF3 requires C, 65.26; H, 3.65; N, 4.23%); max/cm-1 3167, 1773, 1719, 1631, 1581; *m/z* 331 (M+, 19.9%), 302 (44.9), 275 (77.7), 255 (13.4), 159 (94.5), 144 (23.4), 129 (18.1), 116 (35.6), 109 (27.6), 89 (100), 63 (16.5), 40 (22.5).

**3-(4-Trifluoromethoxybenzylamino)-4-phenylcyclobutene-1,2-dione (14e)** (Found: C, 62.21; H, 3.57; N, 4.07. C18H12O3NF3 requires C, 62.25; H, 3.48; N, 4.03%); max/cm-1 3206, 3149, 3058, 1781, 1722, 1580; *m/z* 347 (M+, 21.1%), 319 (35.0), 291 (17.0), 175 (100), 129 (31.6), 116 (17.9), 109 (22.9), 89 (42.8), 69 (15.7).

**3-Pyrrolidino-4-phenylcyclobutene-1,2-dione (14f)** (Found: C, 74.02; H, 5.74; N, 6.13. C14H13O2N requires C, 73.99; H, 5.77; N, 6.16%); max/cm-1 3045, 1752, 1716, 1591; *m/z* 227 (M+, 4.0%), 199 (8.9), 171 (100), 143 (4.8), 128 (9.5), 116 (24.9), 89 (10.4), 43 (30.2).

**3-Morpholino-4-phenylcyclobutene-1,2-dione (14g)** (Found: C, 69.18; H, 5.45; N, 5.68. C14H13O3N requires C, 69.12; H, 5.39; N, 5.76%); max/cm-1 3060, 1778, 1731, 1607, 1594; *m/z* 243 (M+, 5.2%), 215 (9.0), 187 (100), 129 (40.3), 115 (13.9), 102 (13.9), 57 (16.5), 42 (14.9).

**3-(Trifluoromethoxybenzylamino)-4-*n*-butylcyclobutene-1,2-dione (14h)** (Found: C, 58.52; H, 5.11; N, 4.35. C16H16O3NF3 requires C, 58.71; H, 4.93; N, 4.28%); max/cm-1 3218, 3157, 3067, 2960, 2935, 1780, 1722, 1588; *m/z* 327 (M+, 9.4%), 298 (40.6), 270 (49.3), 195 (100), 124 (38.2), 109 (32.5), 69 (23.0), 57 (35.9), 41 (31.3).

**3-(4-Fluorobenzylamino)-4-*n*-butylcyclobutene-1,2-dione (14i)** (Found: C, 69.07; H, 6.03; N, 5.25. C15H16O2NF requires C, 68.95; H, 6.17; N, 5.36%); max/cm-1 3229, 3152, 3059, 2956, 2929, 1779, 1715, 1589; *m/z* 261 (M+, 3.1%), 232 (15.8), 204 (13.0), 124 (20.6), 109 (100), 83 (10.2), 57 (10.1), 41 (9.3).

**3-(3-Trifluoromethylbenzylamino)-4-*n*-butylcyclobutene-1,2-dione (14j)** (Found: C, 61.65; H, 5.02; N, 4.32. C16H16O2NF3 requires C, 61.73; H, 5.18; N, 4.50%); max/cm-1 3140, 3040, 1782, 1723, 1588; *m/z* 311 (M+, 4.3%), 283 (25.4), 253 (48.1), 159 (100), 124 (33.3), 109 (18.2), 96 (17.3), 68 (17.6), 54 (18.5), 41 (21.6).

**3-Piperidino-4-*n*-butylcyclobutene-1,2-dione (14k)** (Found: C, 70.81; H, 8.59; N, 6.52.C13H19O2N requires C, 70.56; H, 8.65; N, 6.33%); max/cm-1 2937, 2862, 1778, 1731, 1603; *m/z* 221 (M+, 4.3%), 193 (32.9), 165 (24.0), 164 (100), 150 (66.1), 122 (40.9), 55 (19.9), 41 (60.6).

**3-(4-Chlorobenzylamino)cyclobutene-1,2-dione (14l)** (Found: C, 60.07; H, 3.74; N, 6.15. C11H8O2NCl requires C, 59.61; H, 3.64; N, 6.32%); max/cm-1 3194, 3103, 2974, 1777, 1741, 1593; *m/z* 221 (M+, 2.9%), 192 (51.3), 152 (9.5), 125 (30.5), 91 (13.6), 68 (100), 40 (4.6).

**3-(3-Fluorobenzylamino)cyclobutene-1,2-dione (14m)** (Found: C, 64.48; H, 4.13; N, 6.84. C11H8O2NF requires C, 64.39; H, 3.93; N, 6.83%); max/cm-1 3190, 3099, 1779, 1751, 1609, 1591; *m/z* 205 (M+, 3.8%), 176 (85.7), 136 (23.7), 109 (91.8), 68 (100), 57 (10.9).

**3-Pyrrolidinocyclobutene-1,2-dione (14n)** max/cm-1 3105, 1775, 1745, 1625.

**3-Morpholinocyclobutene-1,2-dione (14o)** max/cm-1 3095, 1779, 1739, 1602.

**2-Phenyl-3-amino-4-hydroxy-2-cyclobutenone (15a)** (Found: C, 68.46; H, 5.13; N, 7.93. C10H9O2N requires C, 68.56; H, 5.18; N, 8.00%); max/cm-1 3285, 3237, 3102, 1734, 1661, 1600; *m/z* 175 (M+, 100%), 147 (65.5), 130 (56.4), 118 (96.4), 102 (94.2), 89 (85.5), 77 (35.2), 63 (42.9), 51 (38.9), 44 (36.9).

**2-Phenyl-3-allylamino-4-hydroxy-2-cyclobutenone (15b)** (Found: C, 72.53; H, 6.05; N, 6.43. C13H13O2N requires C, 72.54; H, 6.09; N, 6.51%); max/cm-1 3302, 3141, 3060, 1725, 1580; *m/z* 215 (M+, 61.4%), 187 (19.6), 174 (100), 158 (13.6), 146 (66.4), 131 (23.4), 118 (77.9), 102 (25.9), 91 (83.5), 77 (41.7), 56 (83.1), 41 (58.5).

**2-Phenyl-3-(3-methylbenzylamino)-4-hydroxy-2-cyclobutenone (15c)** (Found: C, 77.57; H, 6.39; N, 5.26. C18H17O2N requires C, 77.40; H, 6.13; N, 5.01%); max/cm-1 3330, 3220, 1722, 1580; *m/z* 279 (M+, 21.0%), 174 (44.0), 146 (10.6), 105 (100), 77 (12.1), 51 (5.0), 40 (4.5).

**2-Phenyl-3-(3-trifluoromethylbenzylamino)-4-hydroxy-2-cyclobutenone (15d)** (Found: C, 65.10; H, 4.08; N, 4.03. C18H14O2NF3 requires C, 64.86; H, 4.23; N, 4.20%); max/cm-1 3325, 1727, 1580; *m/z* 333 (M+, 52.7%), 286 (6.4), 174 (12.3), 159 (100), 130 (10.1), 115 (9.6), 109 (17.6), 90 (16.3), 77 (11.3), 69 (10.0), 57 (23.9), 40 (61.3).

**2-Phenyl-3-(4-trifluoromrthoxybenzylamino)-4-hydroxy-2-cyclobutenone (15e)** (Found: C, 61.60; H, 4.08; N, 4.13. C18H14O3NF3 requires C, 61.89; H, 4.04; N, 4.01%); max/cm-1 3316, 3212, 3139, 1724, 1579; *m/z* 349 (M+, 19.0%), 175 (100), 109 (14.5), 89 (9.2), 77 (5.5), 69 (8.3), 44 (4.1).

**2-Phenyl-3-pyrrolidino-4-hydroxy-2-cyclobutenone (15f)** (Found: C, 73.37; H, 6.53; N, 6.03. C14H15O2N requires C, 73.34; H, 6.59; N, 6.11%); max/cm-1 3174, 3064, 1725, 1607, 1579; *m/z* 229 (M+, 43.3%), 201 (38.6), 184 (7.3), 172 (26.0), 144 (9.1), 131 (9.9), 115 (18.8), 103 (11.9), 89 (14.0), 70 (100), 43 (29.6).

**2-Phenyl-3-morpholino-4-hydroxy-2-cyclobutenone (15g)** (Found: C, 68.58; H, 6.16; N, 5.88. C14H15O3N requires C, 68.56; H, 6.16; N, 5.71%); max/cm-1 3216, 1729, 1605, 1590; *m/z* 245 (M+, 47.9%), 217 (39.2), 188 (16.2), 131 (22.6), 102 (30.5), 87 (100), 77 (31.4), 57 (93.6), 42 (16.0).

**2-*n*-Butyl-3-(3-trifluoromethoxybenzylamino)-4-hydroxy-2-cyclobutenone (15h)** (Found: C, 58.14; H, 5.68; N, 4.36. C16H18O3NF3 requires C, 58.36; H, 5.51; N, 4.25%); max/cm-1 3225, 3050, 2975, 2920, 1731, 1590; *m/z* 329 (M+, 14.5%), 286 (13.2), 190 (15.9), 175 (100), 154 (77.7), 126 (23.8), 109 (29.8), 84 (65.8).

**2-*n*-Butyl-3-(4-fluorobenzylamino)-4-hydroxy-2-cyclobutenone (15i)** (Found: C, 68.64; H, 6.63; N, 5.24. C15H18O2NF requires C, 68.42; H, 6.89; N, 5.32%); max/cm-1 3239, 3195, 3084, 2956, 1735, 1588; *m/z* 263 (M+, 5.7%), 220 (4.8), 154 (42.5), 124 (8.9), 109 (100), 84 (33.5), 56 (5.8), 41 (6.2).

**2-*n*-Butyl-3-(3-trifluoromethylbenzylamino)-4-hydroxy-2-cyclobutenone (15j)** (Found: C, 61.60; H, 5.55; N, 4.22. C16H18O2NF3 requires C, 61.34; H, 5.79; N, 4.47%); max/cm-1 3234, 3069, 1731, 1589; *m/z* 313 (M+, 12.2%), 270 (14.2), 174 (13.7), 159 (100), 154 (56.1), 126 (20.9), 109 (16.6), 84 (44.3), 78 (12.7), 41 (11.9).

**2-*n*-Butyl-3-piperidino-4-hydroxy-2-cyclobutenone (15k)** (Found: C, 70.11; H, 9.66; N, 6.41. C13H21O2N requires C, 69.92; H, 9.48; N, 6.27%); max/cm-1 3244, 2932, 2859, 1737, 1574; *m/z* 223 (M+, 0.6%), 193 (19.5), 165 (15.8), 164 (41.4), 150 (32.2), 136 (12.4), 124 (13.8), 122 (27.0), 100 (15.7), 84 (14.6), 82 (35.0), 71 (19.0), 67 (18.9), 57 (100), 41 (60.3).

**3-(4-Chlorobenzylamino)-4-hydroxy-2-cyclobutenone (15l)** (Found: C, 59.17; H, 4.54; N, 6.19. C11H10O2NCl requires C, 59.07; H, 4.51; N, 6.26%); max/cm-1 3230, 3007, 2906, 1728, 1550; *m/z* 223 (M+, 15.8%), 192 (3.2), 140 (4.6), 125 (100), 106 (6.2), 89 (13.4), 68 (9.8), 44 (4.6).

**3-(3-Fluorobenzylamino)-4-hydroxy-2-cyclobutenone (15m)** (Found: C, 63.73; H, 4.97; N, 6,60. C11H10O2NF requires C, 63.76; H, 4.86; N, 6.76%); max/cm-1 3201 (br.), 1718, 1594; *m/z* 207 (M+, 14.0%), 176 (5.5), 124 (12.8), 109 (100), 83 (17.2), 68 (10.0), 44 (7.8).

**3-Pyrrolidino-4-hydroxy-2-cyclobutenone (15n)** (Found: C, 62.73; H, 7.15; N, 9.28. C8H11O2N requires C, 62.73; H, 7.24; N, 9.14%); max/cm-1 3178, 1729, 1579; *m/z* 153 (M+, 67.2%), 139 (13.3), 125 (39.2), 108 (14.1), 95 (100), 68 (72.0), 55 (58.0), 41 (88.0).

**3-Morpholino-4-hydroxy-2-cyclobutenone (15o)** (Found: C, 56.88; H, 6.61; N, 8.30. C8H11O3N requires C, 56.80; H, 6.55; N, 8.28%); max/cm-1 3232, 1725, 1585; *m/z* 169 (M+, 68.2%), 154 (6.1), 141 (27.2), 126 (11.7), 111 (82.7), 82 (45.3), 68 (37.3), 55 (100), 42 (69.5).

**3-Phenyl-4-amino-2(5*H*)-furanone (4a)** (Found: C, 68.66; H, 5.26; N, 8.09. C10H9O2N requires C, 68.56; H, 5.18; N, 8.00%); max/cm-1 3463, 3299, 3177, 1696, 1641, 1609, 1592; *m/z* 175 (M+, 100%), 146 (56.1), 130 (16.5), 118 (50.6), 91 (23.8), 77 (8.0), 63 (8.6).

**3-Phenyl-4-allylamino-2(5*H*)-furanone (4b)** (Found: C, 72.30; H, 6.14; N, 6.50. C13H13O2N requires C, 72.54; H, 6.09; N, 6.51%); max/cm-1 3351, 1708, 1634, 1600; *m/z* 215 (M+, 100%), 196 (26.1), 168 (25.2), 130 (35.9), 115 (25.5), 103 (18.6), 89 (42.4), 77 (18.7), 56 (14.7), 41 (44.2).

**3-Phenyl-4-(3-methylbenzylamino)-2(5*H*)-furanone (4c)** (Found: C, 77.58; H, 6.14; N, 5.13. C18H17O2N requires C, 77.40; H, 6.13; N, 5.01%); max/cm-1 3282, 1713, 1622, 1600; *m/z* 279 (M+, 17.8%), 106 (100), 79 (10.6), 77 (10.3), 40 (20.1).

**3-Phenyl-4-(3-trifluoromethylbenzylamino)-2(5*H*)-furanone (4d)** (Found: C, 64.96; H, 4.14; N, 3.96. C18H14O2NF3 requires C, 64.86; H, 4.23; N, 4.20%); max/cm-1 3257, 3067, 1714, 1627, 1599; *m/z* 333 (M+, 40.1%), 159 (100), 130 (8.4), 109 (16.5), 89 (13.6), 40 (27.9).

**3-Phenyl-4-(4-trifluoromethoxybenzylamino)-2(5*H*)-furanone (4e)** (Found: C, 61.92; H, 4.07; N, 3.92. C18H14O3NF3 requires C, 61.89; H, 4.04; N, 4.01%); max/cm-1 3293, 1714, 1623, 1598; *m/z* 349 (M+, 72.4%), 175 (100), 130 (8.3), 115 (11.5), 109 (38.0), 89 (18.5), 69 (12.7).

**3-Phenyl-4-pyrrolidino-2(5*H*)-furanone (4f)** (Found: C, 73.53; H, 6.77; N, 6.16. C14H15O2N requires C, 73.34; H, 6.59; N, 6.11%); max/cm-1 1710, 1608; *m/z* 229 (M+, 66.7%), 184 (4.8), 132 (8.9), 115 (24.1), 104 (11.1), 89 (9.6), 70 (100), 43 (14.2), 40 (25.4).

**3-Phenyl-4-morpholino-2(5*H*)-furanone (4g)** (Found: C, 68.59; H, 6.03; N, 5.56. C14H15O3N requires C, 68.56; H, 6.16; N, 5.71%); max/cm-1 1713, 1607, 1595; *m/z* 245 (M+, 56.2%), 186 (21.1), 130 (11.1), 115 (14.3), 103 (13.4), 85 (38.8), 57 (21.9), 43 (23.2), 40 (100).

**3-*n*-Butyl-4-(3-trifluoromethoxybenzylamino)-2(5*H*)-furanone (4h)** (Found: C, 58.44; H, 5.46; N, 4.12. C16H18O3NF3 requires C, 58.36; H, 5.51; N, 4.25%); max/cm-1 3307, 3103, 2959, 2933, 2873, 1725, 1631; *m/z* 329 (M+, 5.0%), 190 (17.5), 175 (100), 109 (23.6), 85 (19.4), 71 (19.8), 57 (43.3), 43 (35.7), 41 (26.1).

**3-*n*-Butyl-4-(4-fluorobenzylamino)-2(5*H*)-furanone (4i)** (Found: C, 68.38; H, 6.71; N, 5.23. C15H18O2NF requires C, 68.42; H, 6.89; N, 5.32%); max/cm-1 3301, 3107, 1723, 1631; *m/z* 263 (M+, 6.8%), 220 (8.0), 195 (1.9), 152 (2.8), 109 (100), 83 (7.0), 57 (7.4), 43 (6.2).

**3-*n*-Butyl-4-(3-trifluoromethylbenzylamino)-2(5*H*)-furanone (4j)** (Found: C, 61.58; H, 5.57; N, 4.31. C16H18O2NF3 requires C, 61.34; H, 5.79; N, 4.47%); max/cm-1 3304, 3105, 2958, 2933, 1724, 1631; *m/z* 313 (M+, 9.1%), 270 (23.1), 217 (5.2), 159 (100), 109 (13.0), 85 (6.2), 57 (12.6), 43 (12.7), 41 (12.5).

**3-*n*-Butyl-4-peperidino-2(5*H*)-furanone (4k)** (Found: C, 69.75; H, 9.26; N, 6.06. C13H21O2N requires C, 69.92; H, 9.48; N, 6.27%); max/cm-1 2935, 2860, 1778, 1730, 1608; *m/z* 223 (M+, 13.1%), 180 (100), 164 (19.9), 150 (17.4), 136 (11.0), 122 (13.9), 84 (9.2), 55 (17.7), 41 (31.4).

**4-(4-Chlorobenzylamino)-2(5*H*)-furanone (4l)** (Found: C, 58.97; H, 4.44; N, 6.29. C11H10O2NCl requires C, 59.07; H, 4.51; N, 6.26%); max/cm-1 3237, 3109, 3055, 1787, 1698, 1613; *m/z* 223 (M+, 14.8%), 140 (2.9), 125 (100), 89 (14.0), 75 (18.7), 45 (80.8).

**4-(3-Fluorobenzylamino)-2(5*H*)-furanone (4m)** (Found: C, 63.69; H, 4.90; N, 6,68. C11H10O2NF requires C, 63.76; H, 4.86; N, 6.76%); max/cm-1 3238, 3057, 1701, 1613, 1587; *m/z* 207 (M+, 19.9%), 149 (3.7), 109 (100), 83 (14.9), 68 (9.8), 57 (5.1).

**4-Morpholino-2(5*H*)-furanone (4o)** (Found: C, 56.73; H, 6.54; N, 8.15. C8H11O3N requires C, 56.80; H, 6.55; N, 8.28%); max/cm-1 3136, 2967, 1714, 1612; *m/z* 169 (M+, 100%), 154 (8.7), 140 (6.0), 111 (72.5), 82 (45.5), 53 (45.0), 42 (46.1).
